# Supplementary material for: The etiological effect of a new low-frequency ESR1 variant on Mild Cognitive Impairment and Alzheimer’s Disease: a population-based study
Source: publisher site journal article supplement (doi:10.18632/aging.101548), 2018-09-16
Supplement: Supplementary file [file aging-v10i9-101548-supplementary-material-SD1.pdf]

## SUPPLEMENTARY MATERIALS

**Table S1. Baseline characteristics of participants in the present study.**

|        | AD       |             |             | MCI    |             |             | CN     |             |             |
|--------|----------|-------------|-------------|--------|-------------|-------------|--------|-------------|-------------|
|        | Total    | F           | M           | Total  | F           | M           | Total  | F           | M           |
| No.(%) | 854      | 451 (52.8%) | 403 (47.2%) | 1059   | 678 (57.4%) | 381 (42.6%) | 1254   | 689 (54.9%) | 565 (45.1%) |
| Age(y) | 77.5(14) | 79(13)      | 81(14)      | 73(12) | 69(12)      | 72(10)      | 65(10) | 67(9)       | 68(11)      |
| E+     | 37       | 15          | 22          | 43     | 28          | 15          | 17     | 8           | 9           |
| A+     | 257      | 133         | 124         | 208    | 75          | 133         | 212    | 118         | 94          |

No.:number; F:female; M:male; E+: *ESR1* rs9340803 G allele carrier; A+: *APOEε4* carrier.

### Discovery of NR gene variants using targeted NGS

The sequencing data yielded, on average, 125.5 Mb of 100 bp paired-end sequence reads per individual, representing an average coverage depth of approximately 126X. Approximately 85.3% of the sequence reads were mapped to unique regions of the human genome (Build 37.5, hg19; BWA software). The Samtools software called out, on average, 134 single nucleotide variations (SNVs) per individual compared to the reference genome.

In all, we identified 1690 SNVs. Among those, 329 SNVs were consistent with those in the public SNP database and 1361 SNVs were previously unknown. 100 SNVs resided within putative promoter regions of the 13 genes and 1564 SNPs were located in the introns, all known exons, untranslated regions, or splice sites. A total of 26 SNPs were within non-coding RNA intronic and exonic regions (Table S2).

**Table S2. The summary of SNVs and indels discovered in targeted sequencing stage.**

| Variant type      | No. of known SNVs | No. of novel SNVs | Indels |
|-------------------|-------------------|-------------------|--------|
| Putative Promoter | 17                | 83                | 13     |
| Intron            | 172               | 1194              | 131    |
| 3'UTR             | 95                | 36                | 44     |
| 5'UTR             | 9                 | 3                 | 1      |
| Exon              | 36                | 18                | 12     |
| NcRNA_Intron      | 0                 | 15                | 1      |
| NcRNA_Exon        | 0                 | 11                | 1      |
| Splice site       | 0                 | 1                 | 9      |
| Total             | 329               | 1361              | 213    |

**Table S3. Allele and genotype frequencies of *ESR1* rs9340803.**

|    | CN       | case    | <i>p</i> (G/A) | OR   | 95%CI      | CN       | case    | <i>p</i> (GA/AA) | OR   | 95%CI      |
|----|----------|---------|----------------|------|------------|----------|---------|------------------|------|------------|
| a  | MAF<0.01 | 4/142   | <0.001         | 7.4  | 2.48~10.84 | MAF<0.01 | 4/69    | <0.001           | 7.58 | 2.51~13.06 |
| C1 | 4/386    | 15/389  | 0.01           | 3.72 | 1.22~5.53  | 4/191    | 15/187  | 0.01             | 3.83 | 1.25~6.73  |
| C2 | 13/2105  | 18/1140 | 0.008          | 2.56 | 1.25~3.13  | 13/1046  | 18/561  | 0.008            | 2.58 | 1.26~3.43  |
| C3 | 17/2511  | 37/1671 | <0.001         | 3.27 | 1.84~3.89  | 17/1237  | 37/817  | <0.001           | 3.30 | 1.84~4.22  |
| b  | 17/2511  | 43/2075 | <0.001         | 3.15 | 1.86~3.64  | 17/1237  | 43/1016 | <0.001           | 3.18 | 1.87~3.89  |
| C4 | 17/2511  | 80/3746 | <0.001         | 3.06 | 1.74~3.61  | 17/1237  | 80/1833 | <0.001           | 3.08 | 1.75~3.89  |

C1: sample group1(200 LOAD case vs. 200 controls); C2: sample group 2(581 LOAD cases vs. 1054 cases); C3: combined sample group ( 854 LOAD cases vs. 1254 controls); a: data from the 1000 GENOME; b: 1059 MCI cases vs. 1254 controls; C4: 1913 CI cases vs. 1254 controls.

**Table S4. Stratified analyses of rs9340803 distribution.**

|        |     | E+ | E-   |      | <i>p</i> | <i>pa</i> |             |
|--------|-----|----|------|------|----------|-----------|-------------|
| All    | AD  | 37 | 817  | 854  |          | 0.059     |             |
|        | MCI | 43 | 1016 | 1059 |          |           | <0.001      |
|        | CN  | 17 | 1237 | 1254 | <0.001   |           | <0.001      |
|        | Sum | 97 | 3070 | 3167 |          |           |             |
| Gender | AD  | 15 | 436  | 451  |          |           |             |
|        | MCI | 8  | 681  | 689  |          | 0.490     |             |
|        | CN  | 28 | 650  | 678  | 0.003    |           | 0.001       |
|        | Sum | 51 | 1767 | 1818 |          |           | 0.011       |
|        | AD  | 22 | 381  | 403  |          |           |             |
|        | MCI | 9  | 556  | 565  |          | 0.315     |             |
|        | CN  | 15 | 366  | 381  | 0.004    |           | 0.025 0.001 |
|        | Sum | 46 | 1303 | 1349 |          |           |             |
| Region | AD  | 15 | 551  | 566  |          | 0.232     |             |
|        | MCI | 35 | 864  | 899  |          |           | <0.001      |
|        | CN  | 8  | 742  | 750  | 0.002    |           | 0.03        |
|        | Sum | 58 | 2157 | 2215 |          |           |             |
|        | AD  | 22 | 266  | 288  |          | 0.268     |             |
|        | MCI | 8  | 152  | 160  |          |           | <0.001      |
|        | CN  | 9  | 495  | 504  | <0.001   |           | <0.001      |
|        | Sum | 39 | 913  | 952  |          |           |             |
| APOE   | AD  | 12 | 245  | 257  |          | 0.140     |             |
|        | MCI | 7  | 201  | 208  |          |           | 0.190       |
|        | CN  | 3  | 209  | 212  | 0.141    |           | 0.046       |
|        | Sum | 22 | 655  | 677  |          |           |             |
|        | AD  | 25 | 572  | 597  |          | 0.008     |             |
|        | MCI | 36 | 815  | 851  |          |           | 0.625       |
|        | CN  | 14 | 1028 | 1042 | <0.001   |           | 0.554       |
|        | Sum | 75 | 2415 | 2490 |          |           |             |
| AG     | AD  | 8  | 196  | 204  |          | 0.056     |             |
|        | MCI | 13 | 365  | 378  |          |           | 0.022       |
|        | CN  | 13 | 885  | 898  | 0.025    |           | 0.020       |
|        | Sum | 34 | 1446 | 1480 |          |           |             |
|        | AD  | 29 | 621  | 650  |          | 0.010     |             |
|        | MCI | 30 | 651  | 681  |          |           | 0.005       |
|        | CN  | 4  | 352  | 356  | 0.014    |           | 0.005       |
|        | Sum | 63 | 1624 | 1687 |          |           |             |

E-: ESR1 rs9340803 A allele carrier; N: northern; S: southern; A-: non- APOEε4 carrier; AG: age group.

**Table S5. Comparisons between CI cases and CN on rs9340803 G allele.**

|    | E+    | E-    | $\chi^2$ | <i>p</i> | OR(95%CI)       |
|----|-------|-------|----------|----------|-----------------|
| CI | 80    | 1833  | 20.38    | <0.001   | 3.18(1.87-3.85) |
| CN | 17    | 1237  |          |          |                 |
|    | A+    | A-    | 24.69    | <0.001   | 1.58(1.32-1.95) |
| CI | 465   | 1448  |          |          |                 |
| CN | 212   | 1042  |          |          |                 |
|    | E+ A+ | E+A-  | 0.714    | 0.398    | -               |
| CI | 19    | 61    |          |          |                 |
| CN | 3     | 14    |          |          |                 |
|    | A-/E+ | A-/E- | 17.08    | <0.001   | 3.23(1.80~4.05) |
| CI | 61    | 1387  |          |          |                 |
| CN | 14    | 1028  |          |          |                 |
|    | E-/A+ | E-/A- | 24.33    | <0.001   | 1.58(1.32-1.96) |
| CI | 446   | 1387  |          |          |                 |
| CN | 209   | 1028  |          |          |                 |
|    | E+/A+ | E-/A- | 7.48     | 0.006    | 4.69(1.39-5.89) |
| CI | 19    | 1387  |          |          |                 |
| CN | 3     | 1028  |          |          |                 |

CI: cognitive impairment; MT: G allele carrier; WT:A allele carrier

**Table S6. Logistic analysis of CI with gene variants, gender and age.**

|         | B      | S.E.  | Wals   | df | Sig.  | Exp (B) | 95% CI of EXP(B) |       |
|---------|--------|-------|--------|----|-------|---------|------------------|-------|
|         |        |       |        |    |       |         | lower            | upper |
| apoe4   | 0.382  | 0.101 | 14.426 | 1  | 0.000 | 1.466   | 1.203            | 1.785 |
| gender  | -0.362 | 0.082 | 19.587 | 1  | 0.000 | 0.696   | 0.593            | 0.817 |
| age     | 1.777  | 0.081 | 475.74 | 1  | 0.000 | 5.911   | 5.038            | 6.934 |
| esr1mut | 1.137  | 0.288 | 15.603 | 1  | 0.000 | 3.118   | 1.774            | 5.483 |

**Table S7. Stratified analysis between CI cases and CNs on rs9340803 G allele.**

|     |    | E+ | E-   | <i>p</i> | OR(95%CI)       |
|-----|----|----|------|----------|-----------------|
| F   | CI | 43 | 1086 | <0.001   | 3.37(1.58~4.40) |
|     | CN | 8  | 681  |          |                 |
| M   | CI | 37 | 757  | 0.002    | 3.06(1.46~4.16) |
|     | CN | 9  | 556  |          |                 |
| <70 | CI | 21 | 561  | 0.007    | 2.55(1.27~3.42) |
|     | CN | 13 | 885  |          |                 |
| ≥70 | CI | 59 | 1272 | 0.003    | 4.08(1.47~5.60) |
|     | CN | 4  | 352  |          |                 |

**Table S8. Non-APOEε4-stratified comparisons between CI cases and CNs on rs9340803 G allele.**

| A- |    | E+ | E-  | <i>p</i> | OR(95%CI)       |
|----|----|----|-----|----------|-----------------|
| F  | CI | 9  | 309 | 0.048    | 2.74(0.97~4.03) |
|    | CN | 6  | 565 |          |                 |
| M  | CI | 16 | 263 | 0.002    | 3.52(1.49~5.36) |
|    | CN | 8  | 463 |          |                 |

**Gene-gene & gene-environment interaction**

Compared with CNs, ESR1 rs9340803 G allele and APOE4 synergistically elevating the effect size to 4.69-fold(1.39-5.89) among AD or MCI patients. Given the preliminary results and the fact that aging was the most prominent risk factor, we're promoted to ask whether the identified new low-frequency ESR1 mutation, APOE4 together with aging may collectively contribute to the development of AD. Therefore, gene-gene interaction and gene-circumstance(aging) interaction were explored using GMDR software(<https://sourceforge.net/projects/gmdr/>). It turned out that one three locus-aging model, ESR1 (rs9340803)-APOE (rs429358, rs7412)-aging, had a maximum testing accuracy of 71.22% and a maximum cross-validation consistency (100/100) that was significant at  $p < 0.0001$  level. In the three-locus(rs1387923-rs2769605-rs6265) model, the ORs for the three high-risk genotype combinations (AG)-(TT)-(CC), (AA)-(CC)-(CC), and (AA)-(TC)-(CC) were 2.4(95% CI: 1.2-3.2), 4.7 (95% CI: 1.7-6.3) and 1.3 (95% CI: 1.1-1.7), respectively. Traditional statistical method was utilized in parallel, in order to further validate the risk-associated genotype and haplotype additionally, turned out that: 1) AG-TT-CC genotype occupied the potential of increasing of disease risk to 2.4(1.2-3.2)-fold in specific population, while to 6.30(0.85-10.14)-fold in individuals 70 years and more at age, while the other two genotypes didn't reach the statistically significance( $p=0.821$ ,  $p=0.051$ , respectively); 2) the corresponding risk added up to 2.46 (1.18-3.29)-fold in the elderly with G-T-C haplotype, and to 6.54(0.88-10.52) if aged 70 or older. Besides, multinomial logistic regression analysis was also conducted, of which the result indicated that ESR1 rs9340803, APOE and aging would contribute in joint to the risk of cognitive devastation associated with AD.

**Table S9. Genotype and haplotype analysis of rs9340803, rs429358 and rs7412.**

| Genotype      | CI  | CN  | $\chi^2$ | <i>p</i> | OR(95%CI)        |
|---------------|-----|-----|----------|----------|------------------|
| AG-TT-CC      | 39  | 9   | 5.81     | 0.02     | 2.4(1.2-3.2)     |
| AA-CC-CC      | 34  | 4   | 10.26    | 0.001    | 4.7 (1.7-6.3)    |
| AA-TC-CC      | 288 | 121 | 5.20     | 0.02     | 1.3 (1.1-1.7)    |
| Age $\geq$ 70 | CI  | CN  | $\chi^2$ | <i>p</i> | OR(95%CI)        |
| AG-TT-CC      | 27  | 1   | 4.25     | 0.04     | 6.30(0.85-10.14) |
| Haplotype     | CI  | CN  | $\chi^2$ | <i>p</i> | OR(95%CI)        |
| A-C-C         | 322 | 125 | 9.03     | 0.002    | 1.42 (1.13-1.88) |
| G-T-C         | 40  | 9   | 6.20     | 0.01     | 2.46 (1.18-3.29) |
| G-C-C         | 4   | 2   | 0.01     | 0.91     | 1.11             |
| A-T-T         | 215 | 118 | 0.00     | 0.95     | 1.01             |
| A-C-T         | 23  | 13  | 0.00     | 0.95     | 0.98             |
| G-T-T         | 7   | 4   | 0.00     | 0.96     | 0.97             |
| G-C-T         | 2   | 1   | 0.01     | 0.93     | 1.11             |
| Age $\geq$ 70 | CI  | CN  | $\chi^2$ | <i>p</i> | OR(95%CI)        |
| A-C-C         | 220 | 38  | 2.33     | 0.13     | 1.35(0.92-2.12)  |
| G-T-C         | 28  | 1   | 4.47     | 0.03     | 6.54(0.88-10.52) |

**Table S10. Stratified analyses on MMSE.**

|         | Median(25%, 75%) |            | <i>p</i> |
|---------|------------------|------------|----------|
| E+/-    | 14(10, 20)       | 15(9, 21)  | 0.874    |
| A+/-    | 16(9, 22)        | 15(9, 20)  | 0.178    |
| A-E+/E- | 16.5(10.5, 20)   | 15(9, 20)  | 0.423    |
| F/M     | 14(9, 20)        | 16(10, 21) | 0.103    |
| ≥70/<70 | 14(9, 20)        | 18(13, 22) | <0.001   |

**Table S11. Analyses on serum A $\beta$ -oligomer concentrations ((pmol/L)).**

| A $\beta$ | AD/MCI/CN               |                         |                         | <i>p</i> | CI/CN                   |                        | <i>p</i> | F/M                     |                         | <i>p</i> | $\geq 70 / < 70$        |                         | <i>p</i> |
|-----------|-------------------------|-------------------------|-------------------------|----------|-------------------------|------------------------|----------|-------------------------|-------------------------|----------|-------------------------|-------------------------|----------|
| 40        | 39.69<br>(21.98, 53.50) | 29.63<br>(15.47, 47.92) | 16.52<br>(4.84, 44.64)  | <0.001   | 32.67<br>(16.52, 49.81) | 16.52<br>(4.84, 44.64) | <0.001   | 30.49<br>(12.02, 47.87) | 29.92<br>(12.20, 49.20) | 0.693    | 34.06<br>(15.60, 52.65) | 25.11<br>(8.07, 42.62)  | <0.01    |
| 42        | 3.68<br>(2.17, 5.72)    | 2.74<br>(1.22, 4.60)    | 2.25<br>(1.08, 4.15)    | <0.001   | 3.06<br>(1.41, 4.87)    | 2.25<br>(1.08, 4.15)   | <0.001   | 2.90<br>(1.41, 4.69)    | 2.72<br>(1.16, 4.70)    | 0.212    | 3.22<br>(1.44, 5.04)    | 2.42<br>(1.16, 4.28)    | >0.05    |
| 42/40     | 0.103<br>(0.078, 0.135) | 0.097<br>(0.073, 0.117) | 0.130<br>(0.081, 0.254) | <0.001   | 0.10<br>(0.07, 0.12)    | 0.13<br>(0.08, 0.25)   | <0.001   | 0.103<br>(0.078, 0.140) | 0.098<br>(0.070, 0.134) | 0.003    | 0.098<br>(0.073, 0.127) | 0.105<br>(0.079, 0.159) | >0.05    |

**Table S12. Stratified analyses on serum A $\beta$ -oligomers ((pmol/L)).**

|       | E+/-                    |                         | <i>p</i> | A+/-                    |                         | <i>p</i> | A-E+/-                  |                         | <i>p</i> |
|-------|-------------------------|-------------------------|----------|-------------------------|-------------------------|----------|-------------------------|-------------------------|----------|
| 40    | 35.56<br>(14.84, 57.44) | 30.14<br>(11.98, 48.21) | 0.045    | 33.05<br>(15.25, 52.09) | 29.69<br>(11.48, 47.80) | 0.01     | 30.75<br>(10.59, 56.93) | 29.65<br>(11.35, 47.42) | 0.163    |
| 42    | 3.76<br>(1.43, 5.82)    | 2.80<br>(1.28, 4.67)    | 0.124    | 2.88<br>(1.33, 4.91)    | 2.80<br>(1.29, 4.63)    | 0.468    | 3.14<br>(1.43, 5.79)    | 2.78<br>(1.28, 4.59)    | 0.274    |
| 42/40 | 0.098<br>(0.080, 0.125) | 0.102<br>(0.075, 0.138) | 0.563    | 0.099<br>(0.073, 0.124) | 0.103<br>(0.076, 0.141) | 0.026    | 0.099<br>(0.077, 0.122) | 0.103<br>(0.076, 0.142) | 0.457    |

**Table S13. Four major items of blood lipids (mmol/L).**

|     | AD/MCI/CN            |                      |                      | <i>p</i> | CI/CN                |                      | <i>p</i> | F/M                  |                         | <i>p</i> | $\geq 70 / < 70$     |                      | <i>p</i> |
|-----|----------------------|----------------------|----------------------|----------|----------------------|----------------------|----------|----------------------|-------------------------|----------|----------------------|----------------------|----------|
| Tch | 4.34<br>(3.12, 5.30) | 4.82<br>(4.19, 5.44) | 5.09<br>(4.59, 5.72) | <0.001   | 4.59<br>(3.75, 5.37) | 5.09<br>(4.59, 5.72) | <0.001   | 4.98<br>(4.16, 5.68) | 4.56<br>(3.69, 5.25)    | <0.001   | 4.46<br>(3.55, 5.22) | 5.20<br>(4.64, 5.75) | <0.001   |
| TG  | 1.33<br>(0.88, 2.83) | 1.36<br>(0.97, 1.76) | 1.16<br>(0.91, 1.74) | 0.062    | 1.35<br>(0.9, 2.01)  | 1.16<br>(0.91, 1.74) | 0.027    | 1.22<br>(0.86, 1.97) | 2.72<br>(1.16, 4.70)    | 0.243    | 1.28<br>(0.9, 1.94)  | 1.31<br>(0.91, 1.84) | 0.704    |
| HDL | 1.33<br>(1.11, 1.56) | 1.25<br>(1.09, 1.47) | 1.3<br>(1.11, 1.62)  | 0.051    | 1.29<br>(1.1, 1.51)  | 1.3<br>(1.11, 1.62)  | 0.103    | 1.34<br>(1.15, 1.62) | 0.098<br>(0.070, 0.134) | <0.001   | 1.27<br>(1.1, 1.5)   | 1.31<br>(1.14, 1.61) | 0.037    |
| LDL | 2.74<br>(2.09, 3.33) | 2.71<br>(2.24, 3.22) | 2.84<br>(2.46, 3.34) | 0.324    | 2.73<br>(2.18, 3.3)  | 2.84<br>(2.46, 3.34) | 0.144    | 2.85<br>(2.32, 3.41) | 2.63<br>(2.09, 3.24)    | 0.008    | 2.62<br>(2.06, 3.15) | 2.97<br>(2.52, 3.53) | <0.001   |

Tch: total cholesterol; TG: triglyceride; HDL-c: high density lipoprotein cholesterol; LDL-c: low density lipoprotein cholesterol.

**Table S14. Comparisons on blood lipids (mmol/L).**

|     | E+/-                 |                      | <i>p</i> | A+/-                 |                      | <i>p</i> | A-E+/-               |                      | <i>p</i> |
|-----|----------------------|----------------------|----------|----------------------|----------------------|----------|----------------------|----------------------|----------|
|     |                      |                      |          |                      |                      |          |                      |                      |          |
| Tch | 3.96<br>(1.39, 5.42) | 4.79<br>(3.96, 5.48) | 0.045    | 4.65<br>(3.75, 5.39) | 4.81<br>(3.96, 5.51) | 0.294    | 4.19<br>(1.47, 5.56) | 4.81<br>(3.96, 5.51) | 0.173    |
| TG  | 1.58<br>(0.92, 4.33) | 1.28<br>(0.90, 1.92) | 0.315    | 1.25<br>(0.94, 2.02) | 1.29<br>(0.89, 1.91) | 0.702    | 1.71<br>(1.07, 4.27) | 1.29<br>(0.89, 1.91) | 0.189    |
| HDL | 1.35<br>(1.11, 1.57) | 1.29<br>(1.10, 1.54) | 0.729    | 1.32<br>(1.10, 1.58) | 1.29<br>(1.1, 1.53)  | 0.663    | 1.34<br>(1.09, 1.56) | 1.29<br>(1.1, 1.53)  | 0.909    |
| LDL | 2.47<br>(1.69, 3.52) | 2.76<br>(2.23, 3.31) | 0.293    | 2.71<br>(2.20, 3.37) | 2.78<br>(2.22, 3.3)  | 0.792    | 2.75<br>(1.46, 3.56) | 2.78<br>(2.22, 3.3)  | 0.626    |

a: AD/MCI/CN,  $p < 0.0167$  using Kruskal-Wallis Test; b: CI/CN,  $p < 0.05$  using Mann-Whitney Test.

### Functional prediction for the LOAD-associated variant

We explored the role of *ERS1* rs9340803 G allele in the cytological level preliminarily. Rs9340803A /G was located in the intron 4 of *ERS1* gene, close to the 3' receptor site splicing region of exon 4. MutationTaster, Human Splicing Finder and SFmap were used to assess the potential impact of rs9340803 G variant on *ERS1* alternative splicing, and this variant was predicted to damage the regulation of intrinsic splicing of precursor *ERS1*mRNA. In addition, SFmap predicted that the G allele variant would destroy the binding site for the hnRNP H1, and Human Splicing Finder predicted it to generate a binding site for hnRNP A1, which is known to promote exon exclusion and induced abnormal exon skipping.

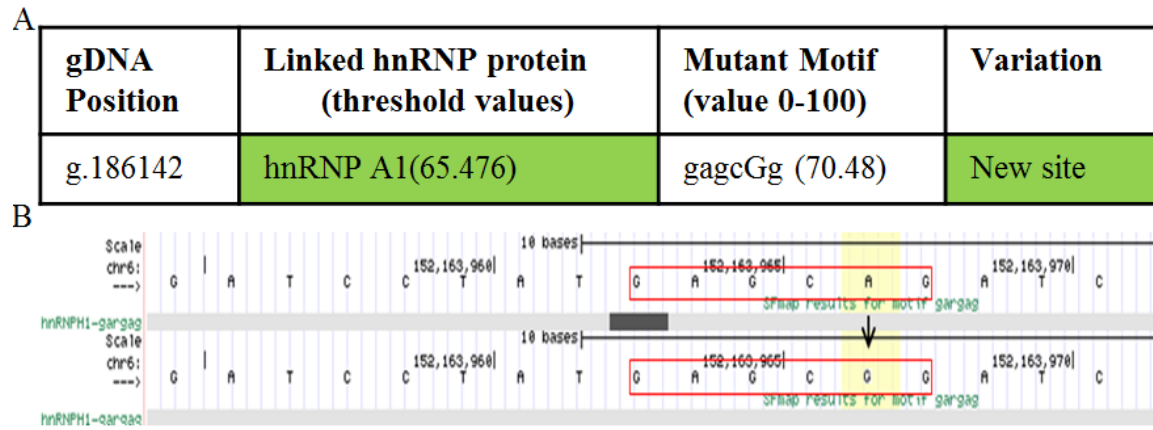

**Figure S1. Functional damaging prediction for rs9340803 A/G variant.** (A). The potential effect of the rs9340803A/G on *ESR1* alternative splicing predicted by HSF. The binding site for hnRNP A1 is predicted to generate. (B). The potential effect of the rs9340803A/G on *ESR1* alternative splicing predicted using Sfmap. This variant is predicted to cause the binding site of hnRNP H1 broken which targets the exonic splicing regulatory sequence (gagcag). Green bars present *ESR1* binding sites of hnRNP H1. The arrows show the rs9340803 A to G change.
